# Supplementary material
Source: PubMed Central journal article supplement (PMC8581828)
Supplement: sj-pdf-1-ebm-10.1177_15353702211023034.pdf [file sj-pdf-1-ebm-10.1177_15353702211023034.pdf]

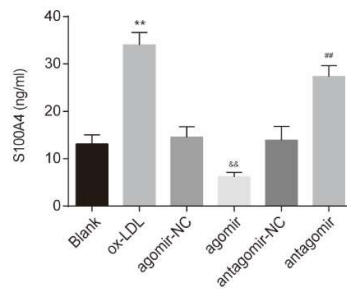

**Supplementary Figure S1. The secretion of S100A5 in HUVECs with the different treatments.** After exposure to ox-LDL (40  $\mu\text{g/ml}$ ), the miR-296-5p agomir or antagomir for 48 h, the level of S100A4 in the supernatant of cultured HUVECs cells was detected via ELISA. \*\* $P < 0.01$  vs. Blank; && $P < 0.01$  vs. agomir-NC; ## $P < 0.01$  vs. antagomir-NC.
